# Supplementary material for: Synthesis and characterization of a nematic fully aromatic polyester based on biphenyl 3,4′-dicarboxylic acid
Source: Royal Society of Chemistry journal article supplement (doi:10.1039/c9py00683d), 2019-01-01
Supplement: c9py00683d1.pdf [file c9py00683d1.pdf]

## Synthesis and characterization of a nematic fully aromatic polyester utilizing biphenyl 3,4'-dicarboxylic acid

### Supporting Information

Katherine V. Heifferon, Glenn A. Spiering, Samantha J. Talley, Maruti Hegde, Robert B. Moore, S. Richard Turner, and Timothy E. Long\*

*Macromolecules Innovation Institute, Department of Chemistry, Virginia Tech, Blacksburg, VA 24061*

\*To whom correspondence should be addressed. Email: [telong@vt.edu](mailto:telong@vt.edu). TEL: (540)231-2480  
FAX: (540)231-8517

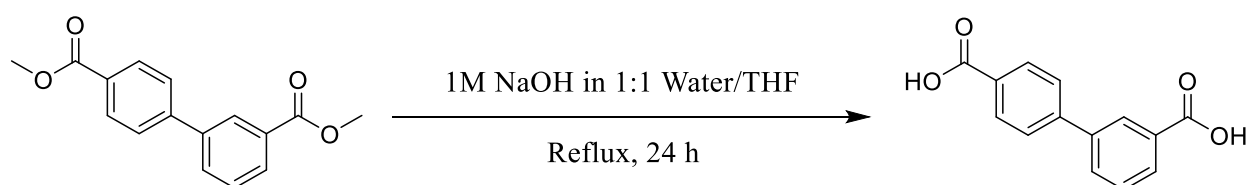

**Scheme S1.** Hydrolysis of dimethyl 3,4'-biphenyl dicarboxylate (3,4'-BB) to synthesize diacid monomer, biphenyl 3,4'-dicarboxylic acid (3,4'-BB-COOH), for acidolysis polymerization.

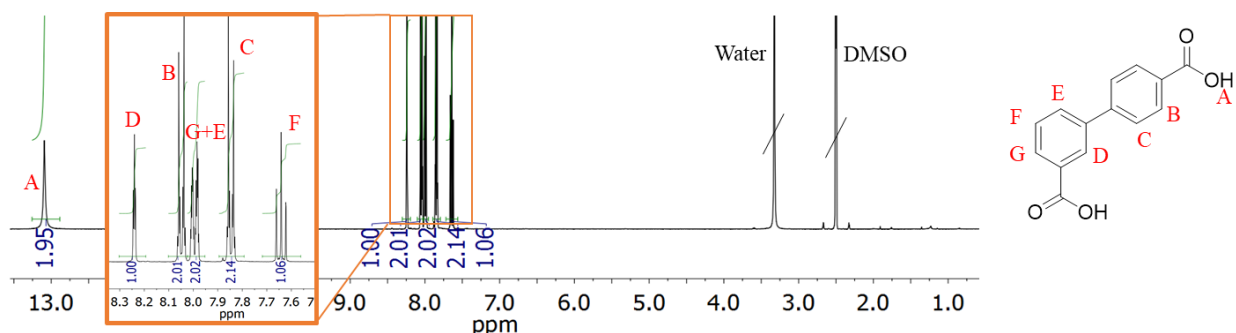

**Figure S1.** Successful hydrolysis of biphenyl 3,4'-dicarboxylic acid confirmed by <sup>1</sup>H NMR spectroscopy (DMSO-d<sub>6</sub>, 400 MHz).

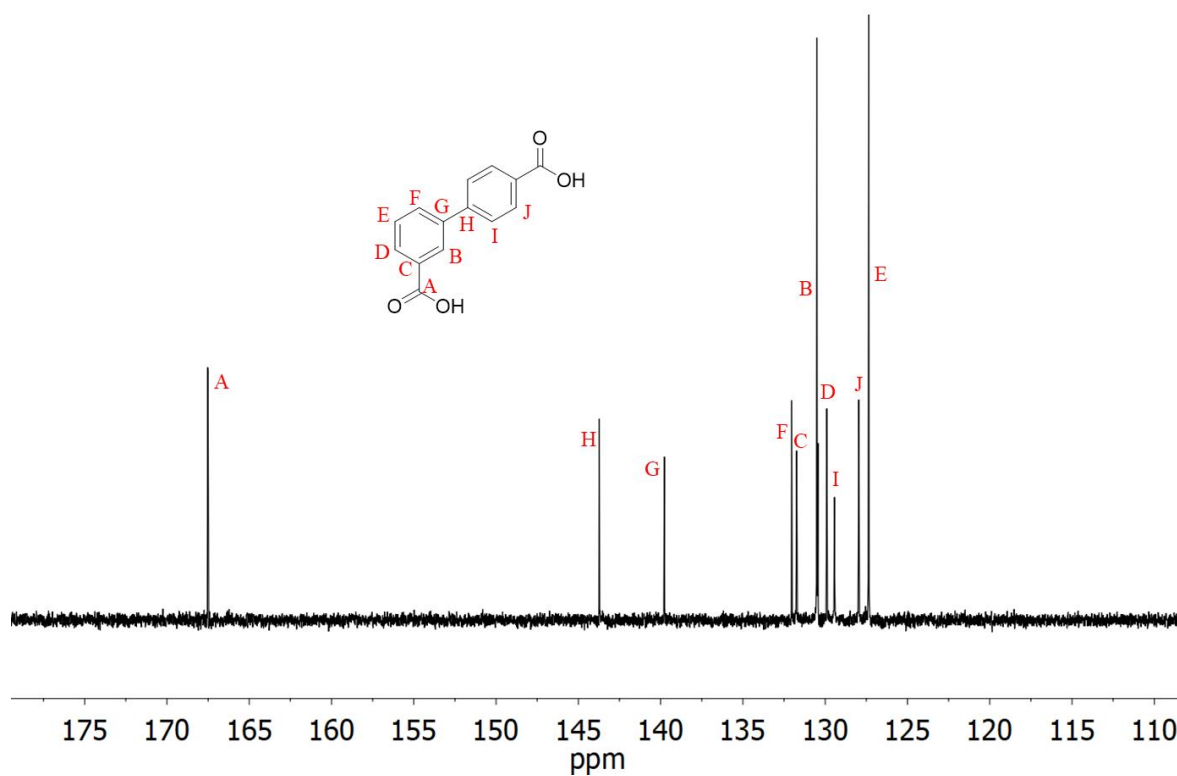

**Figure S2.** Successful hydrolysis of biphenyl 3,4'-dicarboxylic acid confirmed by  $^{13}\text{C}$  NMR spectroscopy (DMSO- $\text{d}_6$ , 400 MHz).

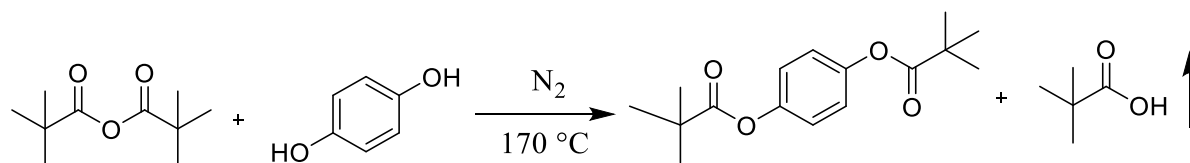

**Scheme S2.** Pivalation of hydroquinone with pivalic anhydride yields hydroquinone dipivalate for acidolysis polymerization.

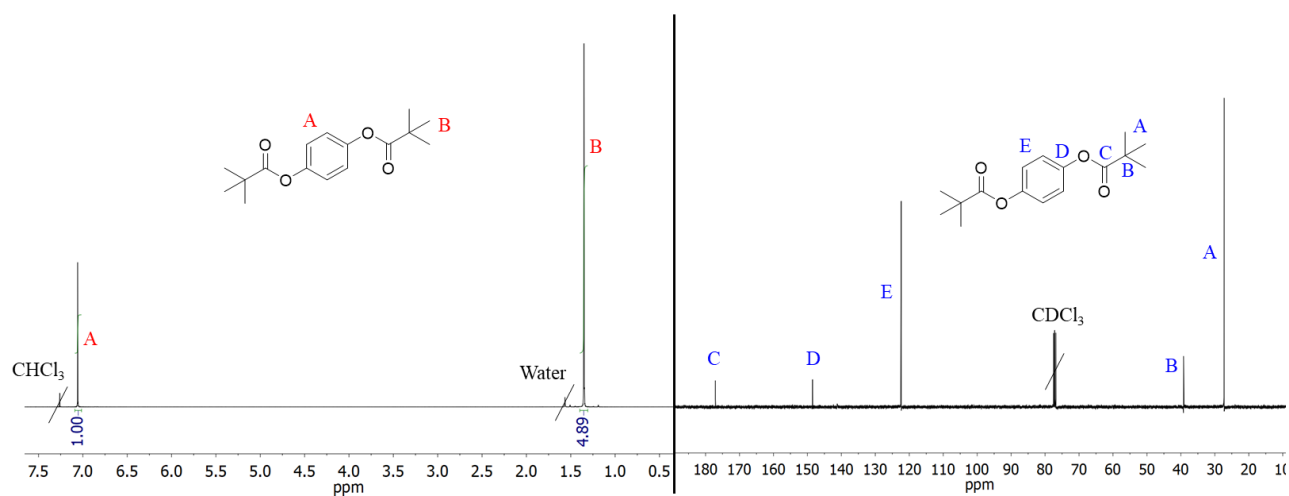

**Figure S3.** Successful pivalation of hydroquinone confirmed through <sup>1</sup>H and <sup>13</sup>C NMR spectroscopy. Left: Peak assignment and <sup>1</sup>H NMR (CDCl<sub>3</sub>, 400 MHz). Right: Peak assignment and <sup>13</sup>C NMR (CDCl<sub>3</sub>, 400 MHz).

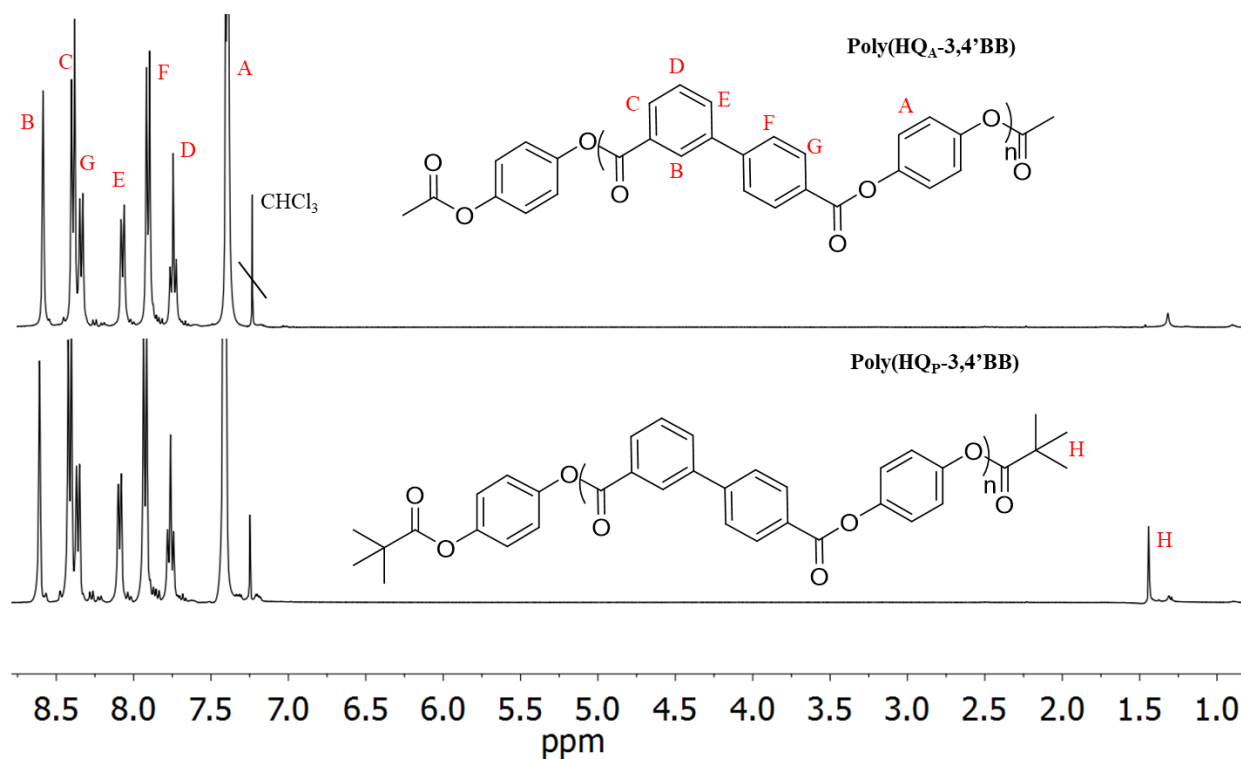

**Figure S4.**  $^1\text{H}$  NMR ( $\text{CDCl}_3$ :TFA-*d*, 400 MHz) spectroscopy of poly(HQ<sub>a</sub>-3,4'BB) (top) and poly(HQ<sub>p</sub>-3,4'BB) (bottom).

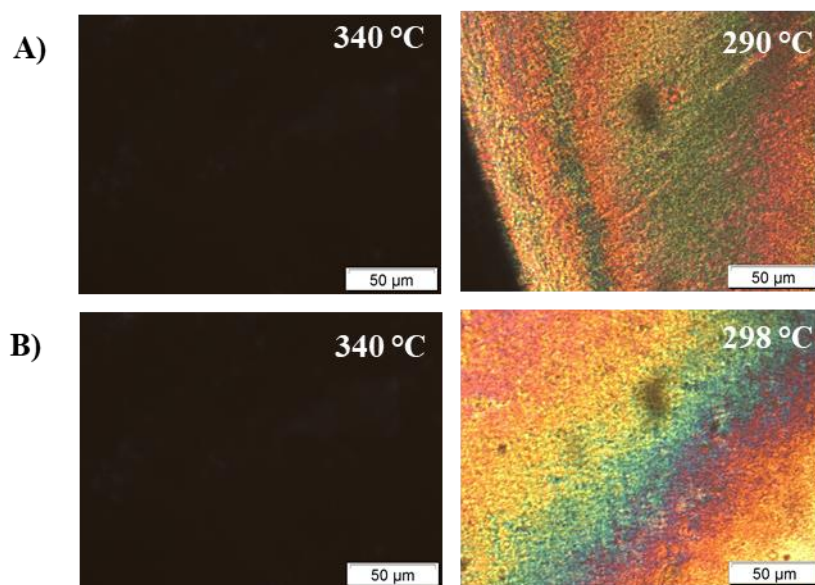

**Figure S5.** Polarized optical microscopy of poly(HQ-3,4'BB) with higher molecular weight due to receiving 30 m of vacuum during the polymerization reveals possible mosaic nematic texture birefringence. Both sets of images were taken during a slow cool at 10 °C/min from the isotropic phase. A) poly(HQ<sub>p</sub>-3,4'BB) B) poly(HQ<sub>a</sub>-3,4'BB).

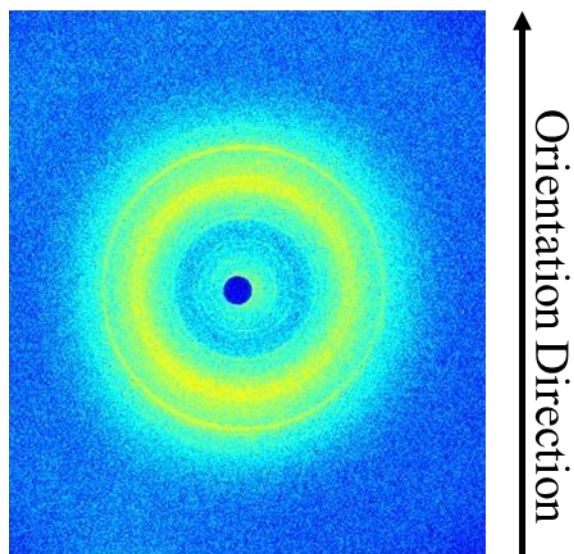

**Orientation procedure:**

- 1) Equilibrate at 310 °C for 10 s
- 2) Draw for 50 s at a rate of 0.5 mm/s from 5 mm to 25 mm at 310 °C
- 3) Quench cool to room temperature

**Figure S6.** 2D WAXS profile of poly(HQ<sub>p</sub>-3,4'BB) after attempts to orient the polymer below the  $T_i$  resulting in crystallization.
